# Supplementary material
Source: PubMed Central journal article supplement (PMC2915477)
Supplement: kwq097_1.pdf [file kwq097_1.pdf]

### Web Appendix. Independence between Step 1 and Step 2 Statistics

We show that the test statistics in Steps 1 and 2 of our 2-step procedure are asymptotically independent. This will follow from a general result that a large sample test (likelihood ratio, Wald, or score test) based on a conditional likelihood  $L(\theta)=\Pr(Y | \mathbf{X}; \theta)$  is asymptotically uncorrelated to any statistic  $S(\mathbf{X})$  based on the conditioning variables only. The proof of the latter, which we sketch below, relies heavily on the following property of conditional expectation(1). For any random variable  $U$  and random vector  $\mathbf{X}$ ,

$$E[(U - E[U | \mathbf{X}])S(\mathbf{X})] = 0 \quad (\text{A1})$$

for any function  $S(\mathbf{X})$  of  $\mathbf{X}$ . This fundamental property, which expresses that  $E[U | \mathbf{X}]$  is the orthogonal projection of  $U$  onto the space generated by all functions of  $\mathbf{X}$ , can in fact be used as the defining property of conditional expectation(1).

Let  $(X_1, Y_1), \dots, (X_n, Y_n)$  be an independent and identically distributed random sample and  $L(\theta) = \prod_{i=1}^n \Pr(Y_i | X_i; \theta)$  be the conditional likelihood. For simplicity we assume that  $Y_i$ , and  $X_i$  are one-dimensional random variables and  $\theta$  is a one-dimensional parameter, but the result generalizes readily to random vectors and a multidimensional parameter (which might include nuisance parameters). Let  $U(\theta) = \partial \log L(\theta) / \partial \theta$  be the score function,  $I(\theta) = -E[\partial^2 L / \partial \theta^2]$  the expected fisher information,  $\hat{\theta}$  the maximum likelihood estimate of  $\theta$ ,  $\mathbf{X}=(X_1, \dots, X_n)$ , and  $\mathbf{Y}=(Y_1, \dots, Y_n)$ ,

By likelihood theory(1, 2) assuming standard regularity conditions, the score has conditional expectation zero, i.e.  $E[U(\theta) | \mathbf{X}] = 0$  (conditional on  $\mathbf{X}$  in this case because the

likelihood is  $L=\Pr(\mathbf{Y} | \mathbf{X})$  from which it also follows that  $E[U(\theta)]=0$  unconditionally.

Additionally, the maximum likelihood estimate of  $\theta$  is closely related to the score as follows(1, 2):

$$\sqrt{I(\hat{\theta})}(\hat{\theta} - \theta) = U(\theta)/\sqrt{I(\theta)} + o_p(1). \quad (\text{A2})$$

Let  $S(\mathbf{X})$  be a statistic based solely on  $\mathbf{X}$ . By the fundamental property of conditional expectation stated above in (A1),

$$0 = E[(U(\theta) - E_\theta[U(\theta) | \mathbf{X}])S(\mathbf{X})] = E[U(\theta)S(\mathbf{X})], \quad (\text{A3})$$

i.e. the score is orthogonal to  $S(\mathbf{X})$ . Assume we are interested in testing the hypothesis  $H_0:\theta=\theta_0$ .

using the Wald statistic,  $W = \sqrt{I(\hat{\theta})}(\hat{\theta} - \theta_0)$ . By (A2), the Wald statistic is asymptotically

equivalent to  $T = U(\theta)/\sqrt{I(\theta)} + \mu_0$ , where  $\mu_0 = \sqrt{I(\theta)}(\theta - \theta_0)$ . By (A3) and the fact

that  $E[T] = \mu_0$  because  $E[U(\theta)]=0$ , we have,

$$\text{cov}(T, S(\mathbf{X})) = E[TS(\mathbf{X})] - E[T]E[S(\mathbf{X})] = E[U(\theta)S(\mathbf{X})]/\sqrt{I(\theta)} + \mu_0E[S(\mathbf{X})] - \mu_0E[S(\mathbf{X})] = 0$$

It follows that the Wald statistic  $W$  (and the likelihood ratio and score statistics which are asymptotically equivalent to it) is asymptotically uncorrelated with  $S(\mathbf{X})$ . Notice that this holds regardless of the true parameter, i.e. either under the null hypothesis  $\theta=\theta_0$  or an alternative  $\theta\neq\theta_0$ .

Now, as shown in Equation 1, the likelihood for trios factors as

$$\Pr(\mathbf{G}_c, \mathbf{E}_c, \mathbf{G}_p \mid \mathbf{D}_c = 1) = \Pr(\mathbf{G}_c \mid \mathbf{E}_c, \mathbf{G}_p, \mathbf{D}_c = 1) \Pr(\mathbf{E}_c, \mathbf{G}_p \mid \mathbf{D}_c = 1)$$

Where  $\mathbf{G}_c$  and  $\mathbf{G}_p$ , denote the genotypes of all the children and all the parents in the sample respectively, and  $\mathbf{E}_c$  and  $\mathbf{D}_c$  denote the environmental variable and disease status of all the children in the sample respectively. The Step 2 statistic is a likelihood ratio statistic (or Wald statistic) based on the conditional likelihood comprising the first factor above,

$L_2 = \Pr(\mathbf{G}_c \mid \mathbf{G}_p, \mathbf{E}_c, \mathbf{D}_c = 1)$ . The statistic in Step 1 is a likelihood ratio statistic (or Wald statistic) based on the second factor  $L_1 = \Pr(\mathbf{E}_c, \mathbf{G}_p \mid \mathbf{D}_c = 1)$ , which only involves the conditioning variables  $\mathbf{G}_p$  and  $\mathbf{E}_c$  of the conditional likelihood  $L_2$ . Thus, the result above applies with  $\mathbf{Y} = \mathbf{G}_c$ , and  $\mathbf{X} = (\mathbf{E}_c, \mathbf{G}_p)$ . The test statistic  $W$  is the Wald version of the Step 2 statistic, and  $S(\mathbf{X})$  is the Wald version of the Step 1 statistic. Furthermore, these two statistics are jointly asymptotically normal, and, because two jointly normal variables that are uncorrelated are also independent, the Step 1 and Step 2 statistics are asymptotically independent.

### **Web Appendix References**

1. Vaart AWvd. Asymptotic statistics. Cambridge, UK; New York NY, 1998.
2. Cox D, Hinkley D. Theoretical Statistics. London: Chapman and Hall, 1974.
